# Supplementary material
Source: HighWire-hosted journal article supplement (https://bibliotheek.ehb.be/content/suppl/2023/07/14/10.1136.bmjmed-2021-000070)
Supplement: bmjmed-2021-000070supp001_data_supplement.pdf [file bmjmed-2021-000070supp001_data_supplement.pdf]

**Supplementary Appendix:** Authors: Zöller B, Pirouzifard M, Holmquist B, Sundquist J, Halling A, Sundquist K

| Table of content pages 1-32 |                          | Pages |
|-----------------------------|--------------------------|-------|
| 1.                          | Supplementary Table S1.  | 2-3   |
| 2.                          | Supplementary Table S2.  | 4-5   |
| 3.                          | Supplementary Table S3.  | 6-7   |
| 4.                          | Supplementary Table S4.  | 8-10  |
| 5.                          | Supplementary Table S5.  | 11    |
| 6.                          | Supplementary Table S6.  | 12    |
| 7.                          | Supplementary Table S7.  | 13    |
| 8.                          | Supplementary Table S8.  | 14    |
| 9.                          | Supplementary Table S9.  | 15    |
| 10.                         | Supplementary Table S10. | 16-18 |
| 11.                         | Supplementary Table S11. | 19    |
| 12.                         | Supplementary Table S12. | 20    |
| 13.                         | Supplementary Table S13. | 21    |
| 14.                         | Supplementary Table S14. | 22    |
| 15.                         | Supplementary Table S15. | 23    |
| 16.                         | Supplementary Table S16. | 24    |
| 17.                         | Supplementary Table S17. | 25    |
| 18.                         | Supplementary Table S18. | 26    |
| 19.                         | Supplementary Table S19  | 27    |
| 20.                         | Supplementary Table S20  | 28    |
| 21.                         | Supplementary Table S21  | 29    |
| 22.                         | Supplementary Table S22  | 30    |
| 23.                         | Supplementary Figure S1. | 31    |
| 24.                         | Statistical Section      | 32    |

**Supplementary Table S1.** Diseases with ICD codes included in the multimorbidity score modified and adapted to Swedish ICD-10 codes after Barnett K et al (2012)\*. Infectious diseases, i.e. viral hepatitis, were excluded and six common non-communicable diseases (NCDs) were added: dermatitis or eczema, gout, arthrosis, osteoporosis, obesity, and pancreas diseases. One point for each disease. The theoretical range of the score is 0-45 points.

|    | Included disorders in the multimorbidity score | ICD-10**                         |
|----|------------------------------------------------|----------------------------------|
| 1  | Hypertension                                   | I10-I15                          |
| 2  | Affective disorders                            | F30-F39                          |
| 3  | Painful back condition                         | M50-54                           |
| 4  | Asthma                                         | J45-J46                          |
| 5  | CHD                                            | I20-I25                          |
| 6  | Ulcer disease                                  | K221, K25-K28                    |
| 7  | Diabetes                                       | E10-E14                          |
| 8  | Thyroid disorders                              | E00-E07                          |
| 9  | Connective tissue disease                      | M05, M06, M08, M09, M30-M36, D86 |
| 10 | Hearing loss (or impaired)                     | H90-H91                          |
| 11 | Chronic obstructive pulmonary disease (COPD)   | J41-J44                          |
| 12 | Anxiety                                        | F40-F48                          |
| 13 | Irritable bowel syndrome (IBS)                 | K58                              |
| 14 | Cancer                                         | C00-C99                          |
| 15 | Alcohol use disorders                          | F10                              |
| 16 | Psychoactive substance misuse                  | F11-F14, F16, F18, F19           |
| 17 | Constipation                                   | K590                             |
| 18 | Cerebrovascular disease                        | I60-I69                          |
| 19 | Renal disease                                  | N00-N19, Q61                     |
| 20 | Diverticular disease of intestine              | K57                              |
| 21 | Atrial fibrillation                            | I48                              |

|                                                                                                                                                                                                                                                                                      |                                  |                       |
|--------------------------------------------------------------------------------------------------------------------------------------------------------------------------------------------------------------------------------------------------------------------------------------|----------------------------------|-----------------------|
| 22                                                                                                                                                                                                                                                                                   | Atherosclerosis                  | I70-I74, I77          |
| 23                                                                                                                                                                                                                                                                                   | Heart failure                    | I50, I110, I130, I132 |
| 24                                                                                                                                                                                                                                                                                   | Prostate disease                 | N40-N42               |
| 25                                                                                                                                                                                                                                                                                   | Glaucoma                         | H40, H42              |
| 26                                                                                                                                                                                                                                                                                   | Epilepsy                         | G40, G41              |
| 27                                                                                                                                                                                                                                                                                   | Dementia                         | F00-F03               |
| 28                                                                                                                                                                                                                                                                                   | Schizophrenia disorders          | F20, F21              |
| 29                                                                                                                                                                                                                                                                                   | Psoriasis                        | L40                   |
| 30                                                                                                                                                                                                                                                                                   | Dermatitis or Eczema             | L20-L30               |
| 31                                                                                                                                                                                                                                                                                   | Inflammatory bowel disease (IBD) | K50, K51              |
| 32                                                                                                                                                                                                                                                                                   | Migraine                         | G43, G440, G441       |
| 33                                                                                                                                                                                                                                                                                   | Blindness & low vision           | H53-H54               |
| 34                                                                                                                                                                                                                                                                                   | Chronic sinusitis                | J32                   |
| 35                                                                                                                                                                                                                                                                                   | Learning disability              | F81                   |
| 36                                                                                                                                                                                                                                                                                   | Anorexia or bulimia              | F50                   |
| 37                                                                                                                                                                                                                                                                                   | Bronchiectasis                   | J47                   |
| 38                                                                                                                                                                                                                                                                                   | Parkinson's disease              | G20, G21, G22         |
| 39                                                                                                                                                                                                                                                                                   | Multiple sclerosis               | G35                   |
| 40                                                                                                                                                                                                                                                                                   | Liver disease                    | K70-K77               |
| 41                                                                                                                                                                                                                                                                                   | Gout                             | M10                   |
| 42                                                                                                                                                                                                                                                                                   | Arthrosis                        | M15-M19               |
| 43                                                                                                                                                                                                                                                                                   | Osteoporosis                     | M80-M82               |
| 44                                                                                                                                                                                                                                                                                   | Obesity                          | E65, E66              |
| 45                                                                                                                                                                                                                                                                                   | Pancreas diseases                | K85, K86              |
| <p>*Barnett K, Mercer SW, Norbury M, Watt G, Wyke S, Guthrie B. Epidemiology of multimorbidity and implications for health care, research, and medical education: a cross-sectional study. <i>Lancet</i> 2012; 380: 37-43.</p> <p>**ICD=International classification of disease.</p> |                                  |                       |

**Supplementary Table S2.** Distribution of multimorbidity scores in relatives (twins, siblings, half-siblings, cousins). One point for every disease. Theoretical range is 0-45. Median score =0, range 0-20.

| Score     | Twins |       | Siblings |       | Half-Siblings |       | Cousins |       |
|-----------|-------|-------|----------|-------|---------------|-------|---------|-------|
|           | n     | %     | n        | %     | n             | %     |         |       |
| <b>0</b>  | 14652 | 61.00 | 938702   | 60.71 | 134405        | 54.58 | 621041  | 59.46 |
| <b>1</b>  | 5838  | 24.30 | 365498   | 23.64 | 60336         | 24.50 | 246478  | 23.60 |
| <b>2</b>  | 2153  | 8.96  | 142931   | 9.24  | 27262         | 11.07 | 99744   | 9.55  |
| <b>3</b>  | 807   | 3.36  | 56830    | 3.68  | 12752         | 5.18  | 42464   | 4.07  |
| <b>4</b>  | 339   | 1.41  | 23956    | 1.55  | 6117          | 2.48  | 19037   | 1.82  |
| <b>5</b>  | 128   | 0.53  | 10142    | 0.66  | 2819          | 1.14  | 8410    | 0.81  |
| <b>6</b>  | 49    | 0.20  | 4294     | 0.28  | 1318          | 0.54  | 3840    | 0.37  |
| <b>7</b>  | 34    | 0.14  | 1992     | 0.13  | 646           | 0.26  | 1790    | 0.17  |
| <b>8</b>  | 11    | 0.05  | 916      | 0.06  | 286           | 0.12  | 852     | 0.08  |
| <b>9</b>  | 4     | 0.02  | 444      | 0.03  | 155           | 0.06  | 440     | 0.04  |
| <b>10</b> | 2     | 0.01  | 193      | 0.01  | 68            | 0.03  | 211     | 0.02  |
| <b>11</b> | 0     | 0.00  | 114      | 0.01  | 39            | 0.02  | 112     | 0.01  |
| <b>12</b> | 1     | 0.00  | 55       | 0.00  | 23            | 0.01  | 74      | 0.01  |
| <b>13</b> | 0     | 0.00  | 24       | 0.00  | 9             | 0.00  | 27      | 0.00  |
| <b>14</b> | 0     | 0.00  | 5        | 0.00  | 3             | 0.00  | 12      | 0.00  |
| <b>15</b> | 0     | 0.00  | 5        | 0.00  | 3             | 0.00  | 7       | 0.00  |
| <b>16</b> | 1     | 0.00  | 4        | 0.00  | 2             | 0.00  | 4       | 0.00  |
| <b>17</b> | 0     | 0.00  | 1        | 0.00  | 1             | 0.00  | 1       | 0.00  |
| <b>18</b> | 0     | 0.00  | 1        | 0.00  | 0             | 0.00  | 0       | 0.00  |
| <b>19</b> | 0     | 0.00  | 1        | 0.00  | 0             | 0.00  | 0       | 0.00  |
| <b>20</b> | 0     | 0.00  | 0        | 0.00  | 0             | 0.00  | 2       | 0.00  |

\*One point for every disease in patient. Included diseases in score: Hypertension, Heart failure, coronary heart disease (CHD), Diabetes, Obesity, Atrial fibrillation, Gout, Atherosclerosis, Renal disease, Affective disorders, Anxiety, Psychoactive substance misuse, Alcohol use disorders, Anorexia or bulimia, Schizophrenia disorders, Inflammatory bowel disease (IBD), Liver disease, Pancreas

diseases, Ulcer disease, Epilepsy, Blindness & low vision, Cerebrovascular disease, Cancer, Hearing loss (or impaired), Connective tissue disease, Osteoporosis, Thyroid disorders, Psoriasis, Prostate disease, Arthrosis, Painful back condition, Diverticular disease of intestine, Chronic sinusitis, Bronchiectasis, Parkinson disease, Glaucoma, Learning disability, Irritable bowel syndrome (IBS), Asthma, Dermatitis and Eczema, Constipation, Chronic obstructive pulmonary disease (COPD), Migraine, Multiple sclerosis and Dementia.

| Supplementary Table S3. Distribution of participants according to county. |                       |                     |
|---------------------------------------------------------------------------|-----------------------|---------------------|
| County                                                                    | Number of individuals | Percentage of total |
|                                                                           |                       |                     |
| 1                                                                         | 434700                | 16.13               |
| 2                                                                         | 33223                 | 1.23                |
| 3                                                                         | 89055                 | 3.31                |
| 4                                                                         | 76406                 | 2.84                |
| 5                                                                         | 134927                | 5.01                |
| 6                                                                         | 101967                | 3.78                |
| 7                                                                         | 57382                 | 2.13                |
| 8                                                                         | 80311                 | 2.98                |
| 9                                                                         | 20357                 | 0.76                |
| 10                                                                        | 51700                 | 1.92                |
| 11                                                                        | 79884                 | 2.96                |
| 12                                                                        | 244757                | 9.08                |
| 13                                                                        | 79637                 | 2.96                |
| 14                                                                        | 260384                | 9.66                |
| 15                                                                        | 117344                | 4.36                |

|    |       |      |
|----|-------|------|
| 16 | 82428 | 3.06 |
| 17 | 88541 | 3.29 |
| 18 | 86066 | 3.19 |
| 19 | 78912 | 2.93 |
| 20 | 91167 | 3.38 |
| 21 | 95137 | 3.53 |
| 22 | 87241 | 3.24 |
| 23 | 42654 | 1.58 |
| 24 | 90520 | 3.36 |
| 25 | 89742 | 3.33 |

| <b>Supplementary Table S4.</b> Descriptive findings for twins, siblings, half-siblings, and cousins stratified according to multimorbidity scores for number of individuals, sex, education, age at the end of study, and birth date. |                                    |                                    |                                    |                                    |                                    |                                    |                                    |                                    |                                    |
|---------------------------------------------------------------------------------------------------------------------------------------------------------------------------------------------------------------------------------------|------------------------------------|------------------------------------|------------------------------------|------------------------------------|------------------------------------|------------------------------------|------------------------------------|------------------------------------|------------------------------------|
|                                                                                                                                                                                                                                       | <b>Multimorbidity scores</b>       |                                    |                                    |                                    |                                    |                                    |                                    |                                    |                                    |
|                                                                                                                                                                                                                                       | <b>All</b>                         | <b>0</b>                           | <b>1</b>                           | <b>2</b>                           | <b>3</b>                           | <b>4</b>                           | <b>≥ 5</b>                         | <b>≤ 1</b>                         | <b>≥ 2</b>                         |
| <b>Twins</b><br>n (%)                                                                                                                                                                                                                 | 24020                              | 14652<br>(61.00)                   | 5838<br>(24.30)                    | 2153<br>(8.96)                     | 807<br>(3.36)                      | 339<br>(1.41)                      | 231<br>(0.96)                      | 20490<br>(85.30)                   | 3530<br>(14.70)                    |
| Sex,<br>Female, n(%)                                                                                                                                                                                                                  | 12003<br>(49.97)                   | 7029<br>(47.97)                    | 2951<br>(50.55)                    | 1188<br>(55.18)                    | 489<br>(60.59)                     | 205<br>(60.47)                     | 141<br>(61.04)                     | 9980<br>(48.71)                    | 2023<br>(57.31)                    |
| Education,<br>>11 years; n(%)                                                                                                                                                                                                         | 4940<br>(20.57)                    | 3236<br>(22.09)                    | 1101<br>(18.86)                    | 369<br>(17.14)                     | 142<br>(17.60)                     | 59<br>(17.40)                      | 33<br>(14.29)                      | 4337<br>(21.17)                    | 603<br>(17.08)                     |
| Age at end of study,<br>Median (IQR)<br>Range (min-max)                                                                                                                                                                               | 22<br>(16-34)<br>(0 -64)           | 22<br>(16-33)<br>(0 -64)           | 22<br>(15-33)<br>(1 -62)           | 23<br>(16-35)<br>(9 -60)           | 25<br>(18-38)<br>(10-64)           | 28<br>(21-42)<br>(1 -59)           | 36<br>(24-47)<br>(6 -62)           | 22<br>(16-33)<br>(0 -64)           | 24<br>(17-37)<br>(1 -64)           |
| Year of birth,<br>Median (IQR)<br>Range (min-max)                                                                                                                                                                                     | 1992<br>(1981-1999)<br>(1951-2005) | 1992<br>(1981-1999)<br>(1951-2005) | 1993<br>(1981-2000)<br>(1953-2005) | 1992<br>(1980-1999)<br>(1953-2005) | 1990<br>(1976-1997)<br>(1951-2005) | 1986<br>(1973-1994)<br>(1953-2005) | 1979<br>(1968-1991)<br>(1953-2004) | 1993<br>(1981-1999)<br>(1951-2005) | 1991<br>(1977-1998)<br>(1951-2005) |
| <b>Sibling,</b><br>(n (%))                                                                                                                                                                                                            | 1546108                            | 938702<br>(60.71)                  | 365498<br>(23.64)                  | 142931<br>(9.24)                   | 56830<br>(3.68)                    | 23956<br>(1.55)                    | 18191<br>(1.18)                    | 1304200<br>(84.35)                 | 241908<br>(15.65)                  |
| Sex,<br>Female, n(%)                                                                                                                                                                                                                  | 755981<br>(48.90)                  | 423077<br>(45.55)                  | 186466<br>(51.61)                  | 78875<br>(55.89)                   | 33263<br>(59.34)                   | 14423<br>(61.16)                   | 11704<br>(64.34)                   | 616009<br>(47.23)                  | 139972<br>(57.86)                  |
| Education,<br>>11 years; n(%)                                                                                                                                                                                                         | 470199<br>(30.76)                  | 298311<br>(32.12)                  | 108534<br>(30.04)                  | 39295<br>(27.84)                   | 14608<br>(26.06)                   | 5641<br>(23.92)                    | 3810<br>(21.32)                    | 411972<br>(31.59)                  | 64308<br>(26.58)                   |

|                                                         |                                    |                                    |                                    |                                    |                                    |                                    |                                    |                                    |                                    |
|---------------------------------------------------------|------------------------------------|------------------------------------|------------------------------------|------------------------------------|------------------------------------|------------------------------------|------------------------------------|------------------------------------|------------------------------------|
| Age at end of study,<br>Median (IQR)<br>Range (min-max) | 31<br>(21-42)<br>(0 -67)           | 30<br>(21-41)<br>(0 -66)           | 31<br>(21-43)<br>(0 -67)           | 32<br>(22-44)<br>(0 -66)           | 35<br>(24-45)<br>(1 -66)           | 37<br>(26-47)<br>(6 -65)           | 41<br>(30-49)<br>(6 -65)           | 30<br>(21-42)<br>(0 -67)           | 34<br>(23-45)<br>(0 -66)           |
| Year of birth,<br>Median (IQR)<br>Range (min-max)       | 1984<br>(1973-1993)<br>(1948-2005) | 1985<br>(1973-1994)<br>(1949-2005) | 1984<br>(1972-1994)<br>(1948-2005) | 1982<br>(1971-1993)<br>(1949-2005) | 1980<br>(1969-1991)<br>(1949-2005) | 1978<br>(1968-1989)<br>(1950-2005) | 1974<br>(1966-1985)<br>(1950-2005) | 1984<br>(1973-1994)<br>(1948-2005) | 1981<br>(1970-1992)<br>(1949-2005) |
| <b>Half sibling</b>                                     | 246244                             | 134405<br>(54.58)                  | 60336<br>(24.50)                   | 27262<br>(11.07)                   | 12752<br>(5.18)                    | 6117<br>(2.48)                     | 5372<br>(2.18)                     | 194741<br>(79.08)                  | 51503<br>(20.92)                   |
| Sex,<br>Female, n(%)                                    | 120574<br>(48.97)                  | 59922<br>(44.58)                   | 30760<br>(50.98)                   | 15175<br>(55.66)                   | 7546<br>(59.18)                    | 3740<br>(61.14)                    | 3431<br>(63.87)                    | 90682<br>(46.57)                   | 29892<br>(58.04)                   |
| Education,<br>>11 years; n(%)                           | 54819<br>(22.26)                   | 32349<br>(24.07)                   | 13214<br>(21.90)                   | 5431<br>(19.92)                    | 2213<br>(17.35)                    | 954<br>(15.60)                     | 658<br>(12.25)                     | 45563<br>(23.40)                   | 9256<br>(17.97)                    |
| Age at end of study,<br>Median (IQR)<br>Range (min-max) | 31<br>(23-41)<br>(0 -67)           | 30<br>(22-40)<br>(0 -67)           | 31<br>(22-41)<br>(0 -67)           | 32<br>(24-43)<br>(1 -66)           | 34<br>(25-45)<br>(5 -66)           | 36<br>(27-47)<br>(4 -65)           | 40<br>(30-50)<br>(7 -66)           | 30<br>(22-40)<br>(0 -67)           | 34<br>(25-45)<br>(1 -66)           |
| Year of birth,<br>median (IQR)<br>Range (min-max)       | 1984<br>(1973-1992)<br>(1948-2005) | 1985<br>(1975-1993)<br>(1948-2005) | 1984<br>(1973-1992)<br>(1948-2005) | 1983<br>(1972-1991)<br>(1949-2005) | 1981<br>(1970-1990)<br>(1949-2005) | 1979<br>(1968-1988)<br>(1950-2005) | 1975<br>(1965-1984)<br>(1949-2005) | 1985<br>(1974-1993)<br>(1948-2005) | 1981<br>(1970-1990)<br>(1949-2005) |
| <b>Cousins</b>                                          | 1044546                            | 621041<br>(59.46)                  | 246478<br>(23.60)                  | 99744<br>(9.55)                    | 42464<br>(4.07)                    | 19037<br>(1.82)                    | 15782<br>(1.51)                    | 867519<br>(83.05)                  | 177027<br>(16.95)                  |
| Sex,<br>Female, n(%)                                    | 505755<br>(48.42)                  | 278051<br>(44.77)                  | 126265<br>(51.23)                  | 55215<br>(55.36)                   | 24958<br>(58.77)                   | 11427<br>(60.03)                   | 9839<br>(62.34)                    | 404316<br>(46.61)                  | 101439<br>(57.30)                  |
| Education,<br>>11 years; n(%)                           | 320112<br>(30.65)                  | 202015<br>(32.53)                  | 73937<br>(30.00)                   | 26999<br>(27.07)                   | 10217<br>(24.06)                   | 4088<br>(21.47)                    | 2856<br>(18.10)                    | 275952<br>(31.81)                  | 44160<br>(24.95)                   |
| Age at end of study,<br>Median (IQR)<br>Range (min-max) | 33<br>(24-44)<br>(0 -68)           | 32<br>(23-42)<br>(0 -66)           | 34<br>(24-44)<br>(0 -67)           | 35<br>(25-46)<br>(0 -67)           | 37<br>(27-48)<br>(1 -66)           | 40<br>(29-49)<br>(1 -67)           | 44<br>(33-52)<br>(3 -68)           | 32<br>(23-43)<br>(0 -67)           | 37<br>(26-48)<br>(0 -68)           |

|                                                   |                                    |                                    |                                    |                                    |                                    |                                    |                                    |                                    |                                    |
|---------------------------------------------------|------------------------------------|------------------------------------|------------------------------------|------------------------------------|------------------------------------|------------------------------------|------------------------------------|------------------------------------|------------------------------------|
| Year of birth,<br>median (IQR)<br>Range (min-max) | 1982<br>(1971-1991)<br>(1947-2005) | 1983<br>(1972-1992)<br>(1949-2005) | 1981<br>(1970-1991)<br>(1948-2005) | 1980<br>(1969-1990)<br>(1948-2005) | 1978<br>(1967-1988)<br>(1949-2005) | 1975<br>(1965-1986)<br>(1948-2005) | 1971<br>(1963-1982)<br>(1947-2005) | 1982<br>(1972-1991)<br>(1948-2005) | 1978<br>(1967-1989)<br>(1947-2005) |
| IQR=Interquartile Range.                          |                                    |                                    |                                    |                                    |                                    |                                    |                                    |                                    |                                    |

| <b>Supplementary Table S5.</b> Stratified ORs according to sex and age among twins.                                                                                                                                                                                                                                                                                                                               |                  |                  |
|-------------------------------------------------------------------------------------------------------------------------------------------------------------------------------------------------------------------------------------------------------------------------------------------------------------------------------------------------------------------------------------------------------------------|------------------|------------------|
|                                                                                                                                                                                                                                                                                                                                                                                                                   | OR (95%CI)       |                  |
|                                                                                                                                                                                                                                                                                                                                                                                                                   | Crude            | Adjusted*        |
| <b><i>Twins Stratified for Sex</i></b>                                                                                                                                                                                                                                                                                                                                                                            |                  |                  |
| Male -Male                                                                                                                                                                                                                                                                                                                                                                                                        | 3.65 (2.92-4.56) | 3.44 (2.74-4.32) |
| Female – Female                                                                                                                                                                                                                                                                                                                                                                                                   | 3.82 (3.17-4.61) | 3.60 (2.97-4.37) |
| Male – Female                                                                                                                                                                                                                                                                                                                                                                                                     | 2.01 (1.63-2.49) | 1.92 (1.55-2.39) |
| Female -Male                                                                                                                                                                                                                                                                                                                                                                                                      | 2.01 (1.63-2.49) | 1.91 (1.53-2.37) |
| <b><i>Twins stratified for Age at end of study</i></b>                                                                                                                                                                                                                                                                                                                                                            |                  |                  |
| Age <= 20                                                                                                                                                                                                                                                                                                                                                                                                         | 3.27 (2.69-3.98) | 3.22 (2.65-3.92) |
| 20 < Age <= 30                                                                                                                                                                                                                                                                                                                                                                                                    | 3.33(2.66-4.15)  | 3.14 (2.50-3.93) |
| Age > 30                                                                                                                                                                                                                                                                                                                                                                                                          | 2.58 (2.12-3.15) | 2.29 (1.87-2.80) |
| Abbreviations: OR = odds ratio. The ORs were derived from double entry. Model 1 is a crude model (univariate). Model 2 is an adjusted model (multivariate), with adjustments for sex, year of birth, county, and educational attainment. In the logistic regression models, the “variance covariance (vce) cluster” method in STATA was used, which calculated robust standard errors using families as clusters. |                  |                  |

| <b>Supplementary Table S6.</b> Stratified ORs according to sex and age among siblings.                                                                                                                                                                                                                                                                                                                            |                  |                  |
|-------------------------------------------------------------------------------------------------------------------------------------------------------------------------------------------------------------------------------------------------------------------------------------------------------------------------------------------------------------------------------------------------------------------|------------------|------------------|
|                                                                                                                                                                                                                                                                                                                                                                                                                   | OR (95%CI)       |                  |
|                                                                                                                                                                                                                                                                                                                                                                                                                   | Crude            | Adjusted*        |
| <i><b>Siblings Stratified for Sex</b></i>                                                                                                                                                                                                                                                                                                                                                                         |                  |                  |
| Male -Male                                                                                                                                                                                                                                                                                                                                                                                                        | 2.11 (2.04-2.18) | 1.91 (1.84-1.98) |
| Female – Female                                                                                                                                                                                                                                                                                                                                                                                                   | 2.00 (1.94-2.05) | 1.89 (1.84-1.95) |
| Male – Female                                                                                                                                                                                                                                                                                                                                                                                                     | 1.85 (1.81-1.89) | 1.74 (1.71-1.78) |
| Female -Male                                                                                                                                                                                                                                                                                                                                                                                                      | 1.85 (1.81-1.89) | 1.73 (1.69-1.77) |
| <i><b>Siblings stratified for Age at end of study</b></i>                                                                                                                                                                                                                                                                                                                                                         |                  |                  |
| Age <= 24                                                                                                                                                                                                                                                                                                                                                                                                         | 2.33 (2.26-2.39) | 2.29 (2.23-2.36) |
| 24 < Age <= 39                                                                                                                                                                                                                                                                                                                                                                                                    | 1.83 (1.79-1.88) | 1.73 (1.69-1.78) |
| Age > 39                                                                                                                                                                                                                                                                                                                                                                                                          | 1.63 (1.60-1.67) | 1.52 (1.48-1.55) |
| Abbreviations: OR = odds ratio. The ORs were derived from double entry. Model 1 is a crude model (univariate). Model 2 is an adjusted model (multivariate), with adjustments for sex, year of birth, county, and educational attainment. In the logistic regression models, the “variance covariance (vce) cluster” method in STATA was used, which calculated robust standard errors using families as clusters. |                  |                  |

| <b>Supplementary Table S7.</b> Stratified ORs according to sex and age among half-siblings.                                                                                                                                                                                                                                                                                                                       |                  |                  |
|-------------------------------------------------------------------------------------------------------------------------------------------------------------------------------------------------------------------------------------------------------------------------------------------------------------------------------------------------------------------------------------------------------------------|------------------|------------------|
|                                                                                                                                                                                                                                                                                                                                                                                                                   | OR (95%CI)       |                  |
|                                                                                                                                                                                                                                                                                                                                                                                                                   | Crude            | Adjusted*        |
| <b><i>Half-siblings Stratified for Sex</i></b>                                                                                                                                                                                                                                                                                                                                                                    |                  |                  |
| Male -Male                                                                                                                                                                                                                                                                                                                                                                                                        | 1.36 (1.31-1.41) | 1.27 (1.22-1.32) |
| Female – Female                                                                                                                                                                                                                                                                                                                                                                                                   | 1.36 (1.32-1.41) | 1.31 (1.27-1.35) |
| Male – Female                                                                                                                                                                                                                                                                                                                                                                                                     | 1.30 (1.27-1.33) | 1.23 (1.20-1.26) |
| Female -Male                                                                                                                                                                                                                                                                                                                                                                                                      | 1.30 (1.27-1.33) | 1.24 (1.21-1.27) |
| <b><i>Half-siblings stratified for Age at end of study</i></b>                                                                                                                                                                                                                                                                                                                                                    |                  |                  |
| Age <= 24                                                                                                                                                                                                                                                                                                                                                                                                         | 1.37 (1.33-1.41) | 1.36 (1.32-1.40) |
| 24 < Age <= 39                                                                                                                                                                                                                                                                                                                                                                                                    | 1.30 (1.27-1.33) | 1.25 (1.22-1.28) |
| Age > 39                                                                                                                                                                                                                                                                                                                                                                                                          | 1.25 (1.21-1.28) | 1.20 (1.16-1.23) |
| Abbreviations: OR = odds ratio. The ORs were derived from double entry. Model 1 is a crude model (univariate). Model 2 is an adjusted model (multivariate), with adjustments for sex, year of birth, county, and educational attainment. In the logistic regression models, the “variance covariance (vce) cluster” method in STATA was used, which calculated robust standard errors using families as clusters. |                  |                  |

| <b>Supplementary Table S8. Stratified ORs according to sex and age among cousins.</b>                                                                                                                                                                                                                                                                                                                             |                  |                  |
|-------------------------------------------------------------------------------------------------------------------------------------------------------------------------------------------------------------------------------------------------------------------------------------------------------------------------------------------------------------------------------------------------------------------|------------------|------------------|
|                                                                                                                                                                                                                                                                                                                                                                                                                   | OR (95%CI)       |                  |
|                                                                                                                                                                                                                                                                                                                                                                                                                   | Crude            | Adjusted*        |
| <b><i>Cousins Stratified for Sex</i></b>                                                                                                                                                                                                                                                                                                                                                                          |                  |                  |
| Male -Male                                                                                                                                                                                                                                                                                                                                                                                                        | 1.20 (1.18-1.23) | 1.13 (1.11-1.15) |
| Female – Female                                                                                                                                                                                                                                                                                                                                                                                                   | 1.19 (1.18-1.21) | 1.15 (1.13-1.17) |
| Male – Female                                                                                                                                                                                                                                                                                                                                                                                                     | 1.18 (1.16-1.19) | 1.12 (1.11-1.14) |
| Female -Male                                                                                                                                                                                                                                                                                                                                                                                                      | 1.18 (1.16-1.19) | 1.12 (1.11-1.14) |
| <b><i>Cousins stratified for Age at end of study</i></b>                                                                                                                                                                                                                                                                                                                                                          |                  |                  |
| Age <= 24                                                                                                                                                                                                                                                                                                                                                                                                         | 1.22 (1.20-1.24) | 1.21 (1.19-1.24) |
| 24 < Age <= 39                                                                                                                                                                                                                                                                                                                                                                                                    | 1.15 (1.14-1.17) | 1.12 (1.10-1.13) |
| Age > 39                                                                                                                                                                                                                                                                                                                                                                                                          | 1.14 (1.12-1.15) | 1.10 (1.08-1.11) |
| Abbreviations: OR = odds ratio. The ORs were derived from double entry. Model 1 is a crude model (univariate). Model 2 is an adjusted model (multivariate), with adjustments for sex, year of birth, county, and educational attainment. In the logistic regression models, the “variance covariance (vce) cluster” method in STATA was used, which calculated robust standard errors using families as clusters. |                  |                  |

| <b>Supplement Table S9.</b> Result of principal component analysis (PCA) followed by factor analysis. Unrotated Eigenvalues for the principal components factors are show. Number of observations = 1570128. Retained factors were 14 factors beyond 1.                                                         |            |            |            |            |
|-----------------------------------------------------------------------------------------------------------------------------------------------------------------------------------------------------------------------------------------------------------------------------------------------------------------|------------|------------|------------|------------|
| Factor                                                                                                                                                                                                                                                                                                          | Eigenvalue | Difference | Proportion | Cumulative |
| Factor1                                                                                                                                                                                                                                                                                                         | 8.00168    | 4.69514    | 0.1778     | 0.1778     |
| Factor2                                                                                                                                                                                                                                                                                                         | 3.30654    | 0.71200    | 0.0735     | 0.2513     |
| Factor3                                                                                                                                                                                                                                                                                                         | 2.59454    | 0.35234    | 0.0577     | 0.3090     |
| Factor4                                                                                                                                                                                                                                                                                                         | 2.24220    | 0.41290    | 0.0498     | 0.3588     |
| Factor5                                                                                                                                                                                                                                                                                                         | 1.82930    | 0.25639    | 0.0407     | 0.3994     |
| Factor6                                                                                                                                                                                                                                                                                                         | 1.57292    | 0.09361    | 0.0350     | 0.4344     |
| Factor7                                                                                                                                                                                                                                                                                                         | 1.47931    | 0.05200    | 0.0329     | 0.4673     |
| Factor8                                                                                                                                                                                                                                                                                                         | 1.42731    | 0.11487    | 0.0317     | 0.4990     |
| Factor9                                                                                                                                                                                                                                                                                                         | 1.31243    | 0.11358    | 0.0292     | 0.5281     |
| Factor10                                                                                                                                                                                                                                                                                                        | 1.19885    | 0.00682    | 0.0266     | 0.5548     |
| Factor11                                                                                                                                                                                                                                                                                                        | 1.19204    | 0.06940    | 0.0265     | 0.5813     |
| Factor12                                                                                                                                                                                                                                                                                                        | 1.12264    | 0.09269    | 0.0249     | 0.6062     |
| Factor13                                                                                                                                                                                                                                                                                                        | 1.02995    | 0.01665    | 0.0229     | 0.6291     |
| Factor14                                                                                                                                                                                                                                                                                                        | 1.01330    | 0.07554    | 0.0225     | 0.6516     |
| Eigenvalue=An eigenvalue is the variance of the factor.<br>Difference= difference between the current and following eigenvalue.<br>Proportion= proportion of variance accounted for by the factor.<br>Cumulative= cumulative proportion of variance accounted for by this factor plus all of the previous ones. |            |            |            |            |

| <b>Supplementary Table S10.</b> Distribution of the factor 1-9 (F1-F9) scores in respective relatives.                                           |       |       |          |       |               |       |         |       |
|--------------------------------------------------------------------------------------------------------------------------------------------------|-------|-------|----------|-------|---------------|-------|---------|-------|
|                                                                                                                                                  | Twins |       | Siblings |       | Half-Siblings |       | Cousins |       |
| <b>Score</b>                                                                                                                                     | n     | %     | n        | %     | n             | %     | n       | %     |
| <b>F1: Hypertension, Heart failure, CHD, Diabetes, Obesity, Atrial fibrillation, Gout, Atherosclerosis and Renal disease.</b>                    |       |       |          |       |               |       |         |       |
| <b>0</b>                                                                                                                                         | 22692 | 94.47 | 1437411  | 92.97 | 223790        | 90.88 | 960831  | 91.99 |
| <b>1</b>                                                                                                                                         | 1161  | 4.83  | 91401    | 5.91  | 18472         | 7.50  | 67741   | 6.49  |
| <b>2</b>                                                                                                                                         | 129   | 0.54  | 12829    | 0.83  | 2865          | 1.16  | 11413   | 1.09  |
| <b>3</b>                                                                                                                                         | 32    | 0.13  | 3327     | 0.22  | 806           | 0.33  | 3293    | 0.32  |
| <b>4</b>                                                                                                                                         | 3     | 0.01  | 818      | 0.05  | 223           | 0.09  | 920     | 0.09  |
| <b>5</b>                                                                                                                                         | 2     | 0.01  | 239      | 0.02  | 63            | 0.03  | 229     | 0.02  |
| <b>6</b>                                                                                                                                         | 1     | 0.00  | 65       | 0.00  | 24            | 0.01  | 89      | 0.01  |
| <b>7</b>                                                                                                                                         | 0     | 0.00  | 17       | 0.00  | 1             | 0.00  | 25      | 0.00  |
| <b>8</b>                                                                                                                                         | 0     | 0.00  | 1        | 0.00  | 0             | 0.00  | 5       | 0.00  |
| <b>F2: Affective disorders, Anxiety, Psychoactive substance misuse, Alcohol use disorders, Anorexia or bulimia, and Schizophrenia disorders.</b> |       |       |          |       |               |       |         |       |
| <b>0</b>                                                                                                                                         | 21461 | 89.35 | 1364992  | 88.29 | 202473        | 82.22 | 909925  | 87.11 |
| <b>1</b>                                                                                                                                         | 1581  | 6.58  | 113198   | 7.32  | 25236         | 10.25 | 82539   | 7.90  |
| <b>2</b>                                                                                                                                         | 671   | 2.79  | 48679    | 3.15  | 12461         | 5.06  | 36894   | 3.53  |
| <b>3</b>                                                                                                                                         | 235   | 0.98  | 14503    | 0.94  | 4405          | 1.79  | 11277   | 1.08  |
| <b>4</b>                                                                                                                                         | 65    | 0.27  | 4303     | 0.28  | 1534          | 0.62  | 3542    | 0.34  |
| <b>5</b>                                                                                                                                         | 7     | 0.03  | 421      | 0.03  | 131           | 0.05  | 357     | 0.03  |
| <b>6</b>                                                                                                                                         | 0     | 0.00  | 12       | 0.00  | 4             | 0.00  | 12      | 0.00  |
| <b>F3: IBD, Liver disease, Pancreas diseases and Ulcer disease.</b>                                                                              |       |       |          |       |               |       |         |       |
| <b>0</b>                                                                                                                                         | 23712 | 98.72 | 1518543  | 98.22 | 240913        | 97.84 | 1023304 | 97.97 |
| <b>1</b>                                                                                                                                         | 295   | 1.23  | 25962    | 1.68  | 4983          | 2.02  | 19903   | 1.91  |
| <b>2</b>                                                                                                                                         | 12    | 0.05  | 1466     | 0.09  | 316           | 0.13  | 1249    | 0.12  |
| <b>3</b>                                                                                                                                         | 1     | 0.00  | 127      | 0.01  | 29            | 0.01  | 84      | 0.01  |

|                                                                                                                           |       |       |         |       |        |       |         |       |
|---------------------------------------------------------------------------------------------------------------------------|-------|-------|---------|-------|--------|-------|---------|-------|
| <b>4</b>                                                                                                                  | 0     | 0.00  | 10      | 0.00  | 3      | 0.00  | 6       | 0.00  |
| <b>F4: Epilepsy, Blindness &amp; low vision, Cerebrovascular disease, Cancer and Hearing loss (or impaired).</b>          |       |       |         |       |        |       |         |       |
| <b>0</b>                                                                                                                  | 22679 | 94.42 | 1463005 | 94.63 | 231525 | 94.02 | 982870  | 94.10 |
| <b>1</b>                                                                                                                  | 1236  | 5.15  | 77738   | 5.03  | 13622  | 5.53  | 57396   | 5.49  |
| <b>2</b>                                                                                                                  | 96    | 0.40  | 4833    | 0.31  | 994    | 0.40  | 3796    | 0.36  |
| <b>3</b>                                                                                                                  | 9     | 0.04  | 487     | 0.03  | 99     | 0.04  | 450     | 0.04  |
| <b>4</b>                                                                                                                  | 0     | 0.00  | 43      | 0.00  | 3      | 0.00  | 32      | 0.00  |
| <b>5</b>                                                                                                                  | 0     | 0.00  | 2       | 0.00  | 1      | 0.00  | 2       | 0.00  |
| <b>F5: Connective tissue disease, Osteoporosis, Thyroid disorders and Psoriasis.</b>                                      |       |       |         |       |        |       |         |       |
| <b>0</b>                                                                                                                  | 23212 | 96.64 | 1480406 | 95.75 | 234321 | 95.16 | 996672  | 95.42 |
| <b>1</b>                                                                                                                  | 774   | 3.22  | 62476   | 4.04  | 11326  | 4.60  | 45455   | 4.35  |
| <b>2</b>                                                                                                                  | 32    | 0.13  | 3098    | 0.20  | 571    | 0.23  | 2302    | 0.22  |
| <b>3</b>                                                                                                                  | 2     | 0.01  | 127     | 0.01  | 26     | 0.01  | 116     | 0.01  |
| <b>4</b>                                                                                                                  | 0     | 0.00  | 1       | 0.00  | 0      | 0.00  | 1       | 0.00  |
| <b>F6: Prostate disease, Arthrosis, Painful back condition, Diverticular disease of intestine, and Chronic sinusitis.</b> |       |       |         |       |        |       |         |       |
| <b>0</b>                                                                                                                  | 22686 | 94.45 | 1426623 | 92.27 | 223215 | 90.65 | 952047  | 91.14 |
| <b>1</b>                                                                                                                  | 1261  | 5.25  | 111705  | 7.22  | 21355  | 8.67  | 85577   | 8.19  |
| <b>2</b>                                                                                                                  | 70    | 0.29  | 7423    | 0.48  | 1586   | 0.64  | 6560    | 0.63  |
| <b>3</b>                                                                                                                  | 3     | 0.01  | 335     | 0.02  | 85     | 0.03  | 351     | 0.03  |
| <b>4</b>                                                                                                                  | 0     | 0.00  | 22      | 0.00  | 3      | 0.00  | 10      | 0.00  |
| <b>5</b>                                                                                                                  | 0     | 0.00  | 0       | 0.00  | 0      | 0.00  | 1       | 0.00  |
| <b>F7: Bronchiectasis, Parkinson disease, Glaucoma, Learning disability and IBS.</b>                                      |       |       |         |       |        |       |         |       |
| <b>0</b>                                                                                                                  | 23696 | 98.65 | 1521190 | 98.39 | 241666 | 98.14 | 1027143 | 98.33 |
| <b>1</b>                                                                                                                  | 322   | 1.34  | 24777   | 1.60  | 4556   | 1.85  | 17300   | 1.66  |
| <b>2</b>                                                                                                                  | 2     | 0.01  | 141     | 0.01  | 22     | 0.01  | 103     | 0.01  |
| <b>F8: Asthma, Dermatitis and Eczema, Constipation, COPD and Migraine.</b>                                                |       |       |         |       |        |       |         |       |
| <b>0</b>                                                                                                                  | 19438 | 80.92 | 1308665 | 84.64 | 205953 | 83.64 | 895829  | 85.76 |

|                                      |       |       |         |       |        |       |         |       |
|--------------------------------------|-------|-------|---------|-------|--------|-------|---------|-------|
| 1                                    | 3821  | 15.91 | 203282  | 13.15 | 34170  | 13.88 | 128054  | 12.26 |
| 2                                    | 686   | 2.86  | 31087   | 2.01  | 5495   | 2.23  | 18772   | 1.80  |
| 3                                    | 74    | 0.31  | 2923    | 0.19  | 594    | 0.24  | 1789    | 0.17  |
| 4                                    | 1     | 0.00  | 149     | 0.01  | 31     | 0.01  | 101     | 0.01  |
| 5                                    | 0     | 0.00  | 2       | 0.00  | 1      | 0.00  | 1       | 0.00  |
| F9: Multiple sclerosis and Dementia. |       |       |         |       |        |       |         |       |
| 0                                    | 23985 | 99.85 | 1542704 | 99.78 | 245630 | 99.75 | 1042116 | 99.77 |
| 1                                    | 35    | 0.15  | 3404    | 0.22  | 613    | 0.25  | 2425    | 0.23  |
| 2                                    | 0     | 0.00  | 0       | 0.00  | 1      | 0.00  | 5       | 0.00  |

|                                                                                                                                                                                                                                                                                                                                                                                                                                                                                                                                                                     |                    |                   |                   |                 |                 |                 |                 |                 |
|---------------------------------------------------------------------------------------------------------------------------------------------------------------------------------------------------------------------------------------------------------------------------------------------------------------------------------------------------------------------------------------------------------------------------------------------------------------------------------------------------------------------------------------------------------------------|--------------------|-------------------|-------------------|-----------------|-----------------|-----------------|-----------------|-----------------|
| <b>Supplementary Table S11.</b> Odds ratio for F1 multimorbidity ( $\geq 2$ score) according to F1 multimorbidity score in proband relatives. Odds Ratios (ORs) with 95 % confidence interval (CI) for F1 multimorbidity scores among relatives. Reference are relatives with probands with no F1 diseases (score $<1$ ). ORs for the included covariates (sex, year birth, education, county (region)) in the adjusted models are presented. F1=Hypertension, Heart failure, CHD, Diabetes, Obesity, Atrial fibrillation, Gout, Atherosclerosis and Renal disease. |                    |                   |                   |                 |                 |                 |                 |                 |
|                                                                                                                                                                                                                                                                                                                                                                                                                                                                                                                                                                     | Twins              |                   | Siblings          |                 | Half-siblings   |                 | Cousins         |                 |
|                                                                                                                                                                                                                                                                                                                                                                                                                                                                                                                                                                     | OR (95% CI)        |                   | OR (95% CI)       |                 | OR (95% CI)     |                 | OR (95% CI)     |                 |
| Proband F1 score                                                                                                                                                                                                                                                                                                                                                                                                                                                                                                                                                    | Crude              | Adjusted          | Crude             | Adjusted        | Crude           | Adjusted        | Crude           | Adjusted        |
| Score 0                                                                                                                                                                                                                                                                                                                                                                                                                                                                                                                                                             | 1.00               | 1.00              | 1.00              | 1.00            | 1.00            | 1.00            | 1.00            | 1.00            |
| Score 1                                                                                                                                                                                                                                                                                                                                                                                                                                                                                                                                                             | 5.75 (3.93-8.42)   | 4.09 (2.75-6.11)  | 2.44(2.33-2.55)   | 1.85(1.76-1.94) | 1.72(1.63-1.82) | 1.46(1.38-1.54) | 1.39(1.36-1.43) | 1.18(1.14-1.21) |
| Score 2                                                                                                                                                                                                                                                                                                                                                                                                                                                                                                                                                             | 9.02 (3.05-26.73)  | 3.11 (0.99-9.81)  | 6.14(5.56-6.78)   | 2.75(2.48-3.05) | 2.75(2.38-3.17) | 1.64(1.42-1.89) | 2.15(2.01-2.30) | 1.30(1.22-1.39) |
| Score 3                                                                                                                                                                                                                                                                                                                                                                                                                                                                                                                                                             | 26.43 (7.29-95.83) | 5.77 (1.14-29.30) | 8.11(7.02-9.37)   | 2.98(2.56-3.47) | 2.93(2.36-3.62) | 1.45(1.16-1.80) | 2.45(2.21-2.71) | 1.34(1.22-1.48) |
| Score 4                                                                                                                                                                                                                                                                                                                                                                                                                                                                                                                                                             | ---                | ---               | 8.73(6.70-11.39)  | 2.81(2.12-3.71) | 3.40(2.39-4.84) | 1.53(1.06-2.20) | 2.74(2.30-3.25) | 1.41(1.19-1.68) |
| Score $\geq 5$                                                                                                                                                                                                                                                                                                                                                                                                                                                                                                                                                      | ---                | ---               | 11.16(7.59-16.42) | 3.33(2.22-4.98) | 3.62(2.16-6.07) | 1.45(0.84-2.53) | 3.53(2.74-4.55) | 1.73(1.34-2.24) |
| Abbreviations: OR = odds ratio. The ORs were derived from double entry. Model 1 is a crude model (univariate). Model 2 is an adjusted model (multivariate), with adjustments for sex, year of birth, county, and educational attainment. In the logistic regression models, the “variance covariance (vce) cluster” method in STATA was used, which calculated robust standard errors using families as clusters.                                                                                                                                                   |                    |                   |                   |                 |                 |                 |                 |                 |

| Supplementary Table S12. Odds ratio for F2 multimorbidity (≥ 2 score) according to F2 multimorbidity score in proband relatives. Odds Ratios (ORs) with 95 % confidence interval (CI) for F2 multimorbidity scores among relatives. Reference are relatives with probands with no F2 diseases (score<1). ORs for the included covariates (sex, year birth, education, county (region)) in the adjusted models are presented. F2= Affective disorders, Anxiety, Psychoactive substance misuse, Alcohol use disorders, Anorexia or bulimia, and Schizophrenia disorders. |                    |                   |                 |                 |                 |                 |                 |                 |
|------------------------------------------------------------------------------------------------------------------------------------------------------------------------------------------------------------------------------------------------------------------------------------------------------------------------------------------------------------------------------------------------------------------------------------------------------------------------------------------------------------------------------------------------------------------------|--------------------|-------------------|-----------------|-----------------|-----------------|-----------------|-----------------|-----------------|
|                                                                                                                                                                                                                                                                                                                                                                                                                                                                                                                                                                        | Twins              |                   | Siblings        |                 | Half-siblings   |                 | Cousins         |                 |
|                                                                                                                                                                                                                                                                                                                                                                                                                                                                                                                                                                        | OR (95% CI)        |                   | OR (95% CI)     |                 | OR (95% CI)     |                 | OR (95% CI)     |                 |
| Proband F2 score                                                                                                                                                                                                                                                                                                                                                                                                                                                                                                                                                       | Crude              | Adjusted          | Crude           | Adjusted        | Crude           | Adjusted        | Crude           | Adjusted        |
| Score 0                                                                                                                                                                                                                                                                                                                                                                                                                                                                                                                                                                | 1.00               | 1.00              | 1.00            | 1.00            | 1.00            | 1.00            | 1.00            | 1.00            |
| Score 1                                                                                                                                                                                                                                                                                                                                                                                                                                                                                                                                                                | 3.66 (3.09-4.45)   | 3.40 (2.83-4.10)  | 2.15(2.10-2.20) | 2.13(2.08-2.18) | 1.29(1.25-1.32) | 1.27(1.24-1.30) | 1.22(1.21-1.24) | 1.22(1.20-1.23) |
| Score 2                                                                                                                                                                                                                                                                                                                                                                                                                                                                                                                                                                | 5.98 (3.09-7.96)   | 5.59 (3.93-7.10)  | 3.20(3.08-3.33) | 3.16(3.04-3.29) | 1.51(1.45-1.58) | 1.48(1.42-1.55) | 1.35(1.31-1.38) | 1.33(1.30-1.37) |
| Score 3                                                                                                                                                                                                                                                                                                                                                                                                                                                                                                                                                                | 10.31 (7.19-14.79) | 9.10 (6.29-13.20) | 4.36(4.13-4.60) | 4.29(4.06-4.52) | 1.71(1.62-1.82) | 1.67(1.58-1.77) | 1.53(1.47-1.59) | 1.52(1.46-1.58) |
| Score 4                                                                                                                                                                                                                                                                                                                                                                                                                                                                                                                                                                | ---                | ---               | 5.13(4.71-5.59) | 5.01(4.59-5.45) | 1.85(1.70-2.01) | 1.81(1.66-1.97) | 1.65(1.55-1.75) | 1.62(1.53-1.72) |
| Score ≥5                                                                                                                                                                                                                                                                                                                                                                                                                                                                                                                                                               | ---                | ---               | 4.56(3.50-5.93) | 4.64(3.56-6.04) | 1.52(1.11-2.07) | 1.50(1.09-2.05) | 1.52(1.26-1.83) | 1.52(1.26-1.84) |
| Abbreviations: OR = odds ratio. The ORs were derived from double entry. Model 1 is a crude model (univariate). Model 2 is an adjusted model (multivariate), with adjustments for sex, year of birth, county, and educational attainment. In the logistic regression models, the “variance covariance (vce) cluster” method in STATA was used, which calculated robust standard errors using families as clusters.                                                                                                                                                      |                    |                   |                 |                 |                 |                 |                 |                 |

|                                                                                                                                                                                                                                                                                                                                                                                                                                                                                                        |                    |                   |                     |                    |                   |                  |                   |                  |
|--------------------------------------------------------------------------------------------------------------------------------------------------------------------------------------------------------------------------------------------------------------------------------------------------------------------------------------------------------------------------------------------------------------------------------------------------------------------------------------------------------|--------------------|-------------------|---------------------|--------------------|-------------------|------------------|-------------------|------------------|
| <b>Supplementary Table S13.</b> Odds ratio for F3 multimorbidity ( $\geq 2$ score) according to F3 multimorbidity score in proband relatives. Odds Ratios (ORs) with 95 % confidence interval (CI) for F3 multimorbidity scores among relatives. Reference are relatives with probands with no F3 diseases (score<1). ORs for the included covariates (sex, year birth, education, county (region)) in the adjusted models are presented. F3= IBD, Liver disease, Pancreas diseases and Ulcer disease. |                    |                   |                     |                    |                   |                  |                   |                  |
|                                                                                                                                                                                                                                                                                                                                                                                                                                                                                                        | Twins              |                   | Siblings            |                    | Half-siblings     |                  | Cousins           |                  |
|                                                                                                                                                                                                                                                                                                                                                                                                                                                                                                        | OR (95% CI)        |                   | OR (95% CI)         |                    | OR (95% CI)       |                  | OR (95% CI)       |                  |
| Proband F3 score                                                                                                                                                                                                                                                                                                                                                                                                                                                                                       | Crude              | Adjusted          | Crude               | Adjusted           | Crude             | Adjusted         | Crude             | Adjusted         |
| Score 0                                                                                                                                                                                                                                                                                                                                                                                                                                                                                                | 1.00               | 1.00              | 1.00                | 1.00               | 1.00              | 1.00             | 1.00              | 1.00             |
| Score 1                                                                                                                                                                                                                                                                                                                                                                                                                                                                                                | 14.71 (3.24-66.68) | 8.97 (1.96-41.14) | 3.19 (2.56-3.99)    | 2.45 (1.96-3.07)   | 1.46 (1.05-2.02)  | 1.13 (0.81-1.56) | 1.28 (1.11-1.48)  | 1.10 (0.95-1.27) |
| Score 2                                                                                                                                                                                                                                                                                                                                                                                                                                                                                                | ---                | ---               | 9.02 (4.22-19.29)   | 6.32 (2.95-13.53)  | 4.00 (1.28-12.47) | 2.67 (0.86-8.29) | 1.24 (0.55-2.80)  | 1.03 (0.45-2.31) |
| Score 3                                                                                                                                                                                                                                                                                                                                                                                                                                                                                                | ---                | ---               | 24.39 (5.59-106.48) | 17.10 (3.76-77.70) | ---               | ---              | 1.42 (0.20-10.15) | 1.04 (0.14-7.48) |
| Score 4                                                                                                                                                                                                                                                                                                                                                                                                                                                                                                | ---                | ---               | ---                 | ---                | ---               | ---              | ---               | ---              |
| Score $\geq 5$                                                                                                                                                                                                                                                                                                                                                                                                                                                                                         | ---                | ---               | ---                 | ---                | ---               | ---              | ---               | ---              |
| Abbreviations: OR = odds ratio. The ORs were derived from double entry. Model 1 is a crude model (univariate). Model 2 is an adjusted model (multivariate), with adjustments for sex, year of birth, county, and educational attainment. In the logistic regression models, the “variance covariance (vce) cluster” method in STATA was used, which calculated robust standard errors using families as clusters.                                                                                      |                    |                   |                     |                    |                   |                  |                   |                  |

| Supplementary Table S14. Odds ratio for F4 multimorbidity (≥ 2 score) according to F4 multimorbidity score in proband relatives. Odds Ratios (ORs) with 95 % confidence interval (CI) for F4 multimorbidity scores among relatives. Reference are relatives with probands with no F4 diseases (score<1). ORs for the included covariates (sex, year birth, education, county (region)) in the adjusted models are presented. F4= Epilepsy, Blindness & low vision, Cerebrovascular disease, Cancer and Hearing loss (or impaired). |                       |                      |                     |                     |                     |                     |                     |                     |
|------------------------------------------------------------------------------------------------------------------------------------------------------------------------------------------------------------------------------------------------------------------------------------------------------------------------------------------------------------------------------------------------------------------------------------------------------------------------------------------------------------------------------------|-----------------------|----------------------|---------------------|---------------------|---------------------|---------------------|---------------------|---------------------|
|                                                                                                                                                                                                                                                                                                                                                                                                                                                                                                                                    | Twins                 |                      | Siblings            |                     | Half-siblings       |                     | Cousins             |                     |
|                                                                                                                                                                                                                                                                                                                                                                                                                                                                                                                                    | OR (95% CI)           |                      | OR (95% CI)         |                     | OR (95% CI)         |                     | OR (95% CI)         |                     |
| Proband F4 score                                                                                                                                                                                                                                                                                                                                                                                                                                                                                                                   | Crude                 | Adjusted             | Crude               | Adjusted            | Crude               | Adjusted            | Crude               | Adjusted            |
| Score 0                                                                                                                                                                                                                                                                                                                                                                                                                                                                                                                            | 1.00                  | 1.00                 | 1.00                | 1.00                | 1.00                | 1.00                | 1.00                | 1.00                |
| Score 1                                                                                                                                                                                                                                                                                                                                                                                                                                                                                                                            | 2.73<br>(1.52-4.90)   | 2.17<br>(1.18-4.02)  | 1.72<br>(1.56-1.90) | 1.37<br>(1.24-1.52) | 1.21<br>(1.06-1.37) | 1.06<br>(0.93-1.21) | 1.16<br>(1.10-1.22) | 1.03<br>(0.97-1.08) |
| Score 2                                                                                                                                                                                                                                                                                                                                                                                                                                                                                                                            | 11.16<br>(2.63-47.24) | 6.37<br>(1.25-32.54) | 3.58<br>(2.49-5.15) | 2.64<br>(1.83-3.80) | 1.02<br>(0.51-2.03) | 0.84<br>(0.42-1.68) | 1.23<br>(0.94-1.61) | 1.05<br>(0.80-1.37) |
| Score 3                                                                                                                                                                                                                                                                                                                                                                                                                                                                                                                            | ---                   | ---                  | 2.49<br>(0.93-6.65) | 1.82<br>(0.67-4.91) | ---                 | ---                 | 0.85<br>(0.43-1.70) | 0.77<br>(0.39-1.53) |
| Score 4                                                                                                                                                                                                                                                                                                                                                                                                                                                                                                                            | ---                   | ---                  | ---                 | ---                 | ---                 | ---                 | ---                 | ---                 |
| Score ≥5                                                                                                                                                                                                                                                                                                                                                                                                                                                                                                                           | ---                   | ---                  | ---                 | ---                 | ---                 | ---                 | ---                 | ---                 |
| Abbreviations: OR = odds ratio. The ORs were derived from double entry. Model 1 is a crude model (univariate). Model 2 is an adjusted model (multivariate), with adjustments for sex, year of birth, county, and educational attainment. In the logistic regression models, the “variance covariance (vce) cluster” method in STATA was used, which calculated robust standard errors using families as clusters.                                                                                                                  |                       |                      |                     |                     |                     |                     |                     |                     |

|                                                                                                                                                                                                                                                                                                                                                                                                                                                                                                                         |                        |                        |                      |                     |                       |                       |                     |                     |
|-------------------------------------------------------------------------------------------------------------------------------------------------------------------------------------------------------------------------------------------------------------------------------------------------------------------------------------------------------------------------------------------------------------------------------------------------------------------------------------------------------------------------|------------------------|------------------------|----------------------|---------------------|-----------------------|-----------------------|---------------------|---------------------|
| <b>Supplementary Table S15.</b> Odds ratio for F5 multimorbidity ( $\geq 2$ score) according to F5 multimorbidity score in proband relatives. Odds Ratios (ORs) with 95 % confidence interval (CI) for F5 multimorbidity scores among relatives. Reference are relatives with probands with no F4 diseases (score<1). ORs for the included covariates (sex, year birth, education, county (region)) in the adjusted models are presented. F5= Connective tissue disease, Osteoporosis, Thyroid disorders and Psoriasis. |                        |                        |                      |                     |                       |                       |                     |                     |
|                                                                                                                                                                                                                                                                                                                                                                                                                                                                                                                         | Twins                  |                        | Siblings             |                     | Half-siblings         |                       | Cousins             |                     |
|                                                                                                                                                                                                                                                                                                                                                                                                                                                                                                                         | OR (95% CI)            |                        | OR (95% CI)          |                     | OR (95% CI)           |                       | OR (95% CI)         |                     |
| Proband F5 score                                                                                                                                                                                                                                                                                                                                                                                                                                                                                                        | Crude                  | Adjusted               | Crude                | Adjusted            | Crude                 | Adjusted              | Crude               | Adjusted            |
| Score 0                                                                                                                                                                                                                                                                                                                                                                                                                                                                                                                 | 1.00                   | 1.00                   | 1.00                 | 1.00                | 1.00                  | 1.00                  | 1.00                | 1.00                |
| Score 1                                                                                                                                                                                                                                                                                                                                                                                                                                                                                                                 | 11.86<br>(5.47-25.73)  | 7.85<br>(3.50-18.40)   | 2.58<br>(2.29-2.90)  | 2.07<br>(1.84-2.33) | 1.66<br>(1.41-1.96)   | 1.41<br>(1.20-1.67)   | 1.32<br>(1.23-1.42) | 1.13<br>(1.05-1.22) |
| Score 2                                                                                                                                                                                                                                                                                                                                                                                                                                                                                                                 | 67.21<br>(8.29-545.26) | 40.95<br>(3.22-520.09) | 8.11<br>(5.40-12.18) | 5.76<br>(3.80-8.74) | 4.93<br>(2.69-9.02)   | 3.76<br>(2.03-6.97)   | 2.13<br>(1.54-2.95) | 1.67<br>(1.21-2.30) |
| Score 3                                                                                                                                                                                                                                                                                                                                                                                                                                                                                                                 | ---                    | ---                    | ---                  | ---                 | 17.13<br>(6.33-46.34) | 10.20<br>(3.60-28.87) | 2.59<br>(0.97-6.93) | 1.83<br>(0.68-4.96) |
| Score 4                                                                                                                                                                                                                                                                                                                                                                                                                                                                                                                 | ---                    | ---                    | ---                  | ---                 | ---                   | ---                   | ---                 | ---                 |
| Score $\geq 5$                                                                                                                                                                                                                                                                                                                                                                                                                                                                                                          | ---                    | ---                    | ---                  | ---                 | ---                   | ---                   | ---                 | ---                 |
| Abbreviations: OR = odds ratio. The ORs were derived from double entry. Model 1 is a crude model (univariate). Model 2 is an adjusted model (multivariate), with adjustments for sex, year of birth, county, and educational attainment. In the logistic regression models, the “variance covariance (vce) cluster” method in STATA was used, which calculated robust standard errors using families as clusters.                                                                                                       |                        |                        |                      |                     |                       |                       |                     |                     |

| Supplementary Table S16. Odds ratio for F6 multimorbidity (≥ 2 score) according to F6 multimorbidity score in proband relatives. Odds Ratios (ORs) with 95 % confidence interval (CI) for F6 multimorbidity scores among relatives. Reference are relatives with probands with no F6 diseases (score<1). ORs for the included covariates (sex, year birth, education, county (region)) in the adjusted models are presented. F6= Prostate disease, Arthrosis, Painful back condition, Diverticular disease of intestine and Chronic sinusitis. |                        |                      |                        |                      |                      |                     |                     |                     |
|------------------------------------------------------------------------------------------------------------------------------------------------------------------------------------------------------------------------------------------------------------------------------------------------------------------------------------------------------------------------------------------------------------------------------------------------------------------------------------------------------------------------------------------------|------------------------|----------------------|------------------------|----------------------|----------------------|---------------------|---------------------|---------------------|
|                                                                                                                                                                                                                                                                                                                                                                                                                                                                                                                                                | Twins                  |                      | Siblings               |                      | Half-siblings        |                     | Cousins             |                     |
|                                                                                                                                                                                                                                                                                                                                                                                                                                                                                                                                                | OR (95% CI)            |                      | OR (95% CI)            |                      | OR (95% CI)          |                     | OR (95% CI)         |                     |
| Proband F6 score                                                                                                                                                                                                                                                                                                                                                                                                                                                                                                                               | Crude                  | Adjusted             | Crude                  | Adjusted             | Crude                | Adjusted            | Crude               | Adjusted            |
| Score 0                                                                                                                                                                                                                                                                                                                                                                                                                                                                                                                                        | 1.00                   | 1.00                 | 1.00                   | 1.00                 | 1.00                 | 1.00                | 1.00                | 1.00                |
| Score 1                                                                                                                                                                                                                                                                                                                                                                                                                                                                                                                                        | 3.95<br>(2.11-7.40)    | 1.45<br>(0.75-2.81)  | 3.10<br>(2.93-3.29)    | 1.59<br>(1.50-1.69)  | 1.91<br>(1.77-2.06)  | 1.27<br>(1.18-1.37) | 1.70<br>(1.64-1.75) | 1.14<br>(1.10-1.18) |
| Score 2                                                                                                                                                                                                                                                                                                                                                                                                                                                                                                                                        | 31.65<br>(8.83-113.39) | 4.00<br>(0.98-16.18) | 7.94<br>(6.63-9.51)    | 2.48<br>(2.07-2.99)  | 3.60<br>(2.81-4.60)  | 1.65<br>(1.28-2.11) | 2.34<br>(2.05-2.67) | 1.20<br>(1.06-1.37) |
| Score 3                                                                                                                                                                                                                                                                                                                                                                                                                                                                                                                                        | ---                    | ---                  | 14.10<br>(8.66-22.95)  | 3.50<br>(2.14-5.75)  | 6.39<br>(3.36-12.15) | 2.07<br>(1.04-4.15) | 2.62<br>(1.80-3.83) | 1.16<br>(0.79-1.70) |
| Score 4                                                                                                                                                                                                                                                                                                                                                                                                                                                                                                                                        | ---                    | ---                  | 23.46<br>(5.48-100.39) | 5.24<br>(1.12-24.55) | ---                  | ---                 | ---                 | ---                 |
| Score ≥5                                                                                                                                                                                                                                                                                                                                                                                                                                                                                                                                       | ---                    | ---                  | ---                    | ---                  | ---                  | ---                 | ---                 | ---                 |
| Abbreviations: OR = odds ratio. The ORs were derived from double entry. Model 1 is a crude model (univariate). Model 2 is an adjusted model (multivariate), with adjustments for sex, year of birth, county, and educational attainment. In the logistic regression models, the “variance covariance (vce) cluster” method in STATA was used, which calculated robust standard errors using families as clusters.                                                                                                                              |                        |                      |                        |                      |                      |                     |                     |                     |

|                                                                                                                                                                                                                                                                                                                                                                                                                                                                                                                   |             |          |                     |                     |                     |                     |                     |                     |
|-------------------------------------------------------------------------------------------------------------------------------------------------------------------------------------------------------------------------------------------------------------------------------------------------------------------------------------------------------------------------------------------------------------------------------------------------------------------------------------------------------------------|-------------|----------|---------------------|---------------------|---------------------|---------------------|---------------------|---------------------|
| <b>Supplementary Table S17.</b> Odds ratio for F7 multimorbidity (≥ 2 score) according to F7 multimorbidity score in proband relatives. Odds Ratios (ORs) with 95 % confidence interval (CI) for F7 multimorbidity scores among relatives. Reference are relatives with probands with no F7 diseases (score<1). ORs for the included covariates (sex, year birth, education, county (region)) in the adjusted models are presented. F7= Bronchiectasis, Parkinson disease, Glaucoma, Learning disability and IBS. |             |          |                     |                     |                     |                     |                     |                     |
|                                                                                                                                                                                                                                                                                                                                                                                                                                                                                                                   | Twins       |          | Siblings            |                     | Half-siblings       |                     | Cousins             |                     |
|                                                                                                                                                                                                                                                                                                                                                                                                                                                                                                                   | OR (95% CI) |          | OR (95% CI)         |                     | OR (95% CI)         |                     | OR (95% CI)         |                     |
| Proband F7 score                                                                                                                                                                                                                                                                                                                                                                                                                                                                                                  | Crude       | Adjusted | Crude               | Adjusted            | Crude               | Adjusted            | Crude               | Adjusted            |
| Score 0                                                                                                                                                                                                                                                                                                                                                                                                                                                                                                           | ---         | ---      | 1.00                | 1.00                | 1.00                | 1.00                | 1.00                | 1.00                |
| Score 1                                                                                                                                                                                                                                                                                                                                                                                                                                                                                                           | ---         | ---      | 3.21<br>(1.50-6.86) | 3.06<br>(1.43-6.57) | 1.98<br>(0.63-6.05) | 1.92<br>(0.63-5.85) | 1.15<br>(0.65-2.05) | 1.13<br>(0.63-2.00) |
| Score 2                                                                                                                                                                                                                                                                                                                                                                                                                                                                                                           | ---         | ---      | ---                 | ---                 | ---                 | ---                 | ---                 | ---                 |
| Score 3                                                                                                                                                                                                                                                                                                                                                                                                                                                                                                           | ---         | ---      | ---                 | ---                 | ---                 | ---                 | ---                 | ---                 |
| Score 4                                                                                                                                                                                                                                                                                                                                                                                                                                                                                                           | ---         | ---      | ---                 | ---                 | ---                 | ---                 | ---                 | ---                 |
| Score ≥5                                                                                                                                                                                                                                                                                                                                                                                                                                                                                                          | ---         | ---      | ---                 | ---                 | ---                 | ---                 | ---                 | ---                 |
| Abbreviations: OR = odds ratio. The ORs were derived from double entry. Model 1 is a crude model (univariate). Model 2 is an adjusted model (multivariate), with adjustments for sex, year of birth, county, and educational attainment. In the logistic regression models, the “variance covariance (vce) cluster” method in STATA was used, which calculated robust standard errors using families as clusters.                                                                                                 |             |          |                     |                     |                     |                     |                     |                     |

|                                                                                                                                                                                                                                                                                                                                                                                                                                                                                                               |                        |                        |                        |                       |                     |                     |                     |                     |
|---------------------------------------------------------------------------------------------------------------------------------------------------------------------------------------------------------------------------------------------------------------------------------------------------------------------------------------------------------------------------------------------------------------------------------------------------------------------------------------------------------------|------------------------|------------------------|------------------------|-----------------------|---------------------|---------------------|---------------------|---------------------|
| <b>Supplementary Table S18.</b> Odds ratio for F8 multimorbidity ( $\geq 2$ score) according to F8 multimorbidity score in proband relatives. Odds Ratios (ORs) with 95 % confidence interval (CI) for F8 multimorbidity scores among relatives. Reference are relatives with probands with no F8 diseases (score<1). ORs for the included covariates (sex, year birth, education, county (region)) in the adjusted models are presented. F8= Asthma, Dermatitis and Eczema, Constipation, COPD and Migraine. |                        |                        |                        |                       |                     |                     |                     |                     |
|                                                                                                                                                                                                                                                                                                                                                                                                                                                                                                               | Twins                  |                        | Siblings               |                       | Half-siblings       |                     | Cousins             |                     |
|                                                                                                                                                                                                                                                                                                                                                                                                                                                                                                               | OR (95% CI)            |                        | OR (95% CI)            |                       | OR (95% CI)         |                     | OR (95% CI)         |                     |
| Proband F8 score                                                                                                                                                                                                                                                                                                                                                                                                                                                                                              | Crude                  | Adjusted               | Crude                  | Adjusted              | Crude               | Adjusted            | Crude               | Adjusted            |
| Score 0                                                                                                                                                                                                                                                                                                                                                                                                                                                                                                       | 1.00                   | 1.00                   | 1.00                   | 1.00                  | 1.00                | 1.00                | 1.00                | 1.00                |
| Score 1                                                                                                                                                                                                                                                                                                                                                                                                                                                                                                       | 3.50<br>(2.95-4.16)    | 2.84<br>(2.39-3.39)    | 2.52<br>(2.46-2.60)    | 2.09<br>(2.04-2.15)   | 1.43<br>(1.38-1.49) | 1.36<br>(1.31-1.41) | 1.34<br>(1.32-1.37) | 1.20<br>(1.18-1.22) |
| Score 2                                                                                                                                                                                                                                                                                                                                                                                                                                                                                                       | 15.83<br>(11.98-20.93) | 11.62<br>(8.72-15.48)  | 7.02<br>(6.67-7.40)    | 4.91<br>(4.65-5.17)   | 2.14<br>(1.94-2.37) | 1.95<br>(1.76-2.16) | 1.80<br>(1.71-1.90) | 1.40<br>(1.33-1.48) |
| Score 3                                                                                                                                                                                                                                                                                                                                                                                                                                                                                                       | 31.42<br>(18.69-52.81) | 21.18<br>(12.53-35.78) | 13.07<br>(11.82-14.46) | 8.43<br>(7.61-9.34)   | 2.78<br>(2.27-3.40) | 2.51<br>(2.06-3.07) | 2.23<br>(1.98-2.52) | 1.65<br>(1.46-1.86) |
| Score 4                                                                                                                                                                                                                                                                                                                                                                                                                                                                                                       | ---                    | ---                    | 18.04<br>(12.34-26.36) | 12.84<br>(8.77-18.79) | 2.47<br>(1.13-5.40) | 2.77<br>(1.34-5.72) | 2.17<br>(1.24-3.78) | 1.77<br>(1.02-3.08) |
| Score $\geq 5$                                                                                                                                                                                                                                                                                                                                                                                                                                                                                                | ---                    | ---                    | ---                    | ---                   | ---                 | ---                 | ---                 | ---                 |
| Abbreviations: OR = odds ratio. The ORs were derived from double entry. Model 1 is a crude model (univariate). Model 2 is an adjusted model (multivariate), with adjustments for sex, year of birth, county, and educational attainment. In the logistic regression models, the “variance covariance (vce) cluster” method in STATA was used, which calculated robust standard errors using families as clusters.                                                                                             |                        |                        |                        |                       |                     |                     |                     |                     |

|                                                                                                                                                                                                                                                                                                                                                                                                                                                                                |             |          |             |          |               |          |             |          |
|--------------------------------------------------------------------------------------------------------------------------------------------------------------------------------------------------------------------------------------------------------------------------------------------------------------------------------------------------------------------------------------------------------------------------------------------------------------------------------|-------------|----------|-------------|----------|---------------|----------|-------------|----------|
| <b>Supplementary Table S19.</b> Odds ratio for F9 multimorbidity ( $\geq 2$ score) according to F9 multimorbidity score in proband relatives. Odds Ratios (ORs) with 95 % confidence interval (CI) for F9 multimorbidity scores among relatives. Reference are relatives with probands with no F9 diseases (score<1). ORs for the included covariates (sex, year birth, education, county (region)) in the adjusted models are presented. F9= Multiple sclerosis and Dementia. |             |          |             |          |               |          |             |          |
|                                                                                                                                                                                                                                                                                                                                                                                                                                                                                | Twins       |          | Siblings    |          | Half-siblings |          | Cousins     |          |
|                                                                                                                                                                                                                                                                                                                                                                                                                                                                                | OR (95% CI) |          | OR (95% CI) |          | OR (95% CI)   |          | OR (95% CI) |          |
| Proband F9 score                                                                                                                                                                                                                                                                                                                                                                                                                                                               | Crude       | Adjusted | Crude       | Adjusted | Crude         | Adjusted | Crude       | Adjusted |
| Score 0                                                                                                                                                                                                                                                                                                                                                                                                                                                                        | ---         | ---      | ---         | ---      | ---           | ---      | ---         | ---      |
| Score 1                                                                                                                                                                                                                                                                                                                                                                                                                                                                        | ---         | ---      | ---         | ---      | ---           | ---      | ---         | ---      |
| Score 2                                                                                                                                                                                                                                                                                                                                                                                                                                                                        | ---         | ---      | ---         | ---      | ---           | ---      | ---         | ---      |
| Score 3                                                                                                                                                                                                                                                                                                                                                                                                                                                                        | ---         | ---      | ---         | ---      | ---           | ---      | ---         | ---      |
| Score 4                                                                                                                                                                                                                                                                                                                                                                                                                                                                        | ---         | ---      | ---         | ---      | ---           | ---      | ---         | ---      |
| Score $\geq 5$                                                                                                                                                                                                                                                                                                                                                                                                                                                                 | ---         | ---      | ---         | ---      | ---           | ---      | ---         | ---      |
| Abbreviations: OR = odds ratio. The ORs were derived from double entry. Model 1 is a crude model (univariate). Model 2 is an adjusted model (multivariate), with adjustments for sex, year of birth, county, and educational attainment. In the logistic regression models, the “variance covariance (vce) cluster” method in STATA was used, which calculated robust standard errors using families as clusters.                                                              |             |          |             |          |               |          |             |          |

**Supplementary Table S20.** Number of observation and cases in Table 2, i.e. Cases, No./person at risk No in Table 2. £

|               | Twins (n=24020)               | Siblings (n=1546108)          | Half-siblings (n=984976)      | Cousins (n=6623156)           |
|---------------|-------------------------------|-------------------------------|-------------------------------|-------------------------------|
| Proband score | Cases, No./person at risk No. |
| Score 0       | 1502/14652                    | 121783/938702                 | 102229/543007                 | 623597/3982972                |
| Score 1       | 980/5838                      | 62125/365498                  | 50313/240617                  | 261183/1555796                |
| Score 2       | 543/2153                      | 30869/142931                  | 24698/107084                  | 110063/621032                 |
| Score 3       | 269/807                       | 14383/56830                   | 12284/50049                   | 48363/258695                  |
| Score 4       | 126/339                       | 6871/23956                    | 6223/23976                    | 22516/113660                  |
| Score ≥5      | 110/231                       | 5877/18191                    | 5605/20243                    | 18666/91001                   |

£Based on double entry.

**Supplementary Table S21.** Number of observation and cases in Table 3, i.e. Cases, No./person at risk No in Table 3. <sup>£</sup>

|               | Twins (n=24020)               | Siblings (n=1546108)          | Half-siblings (n=984976)      | Cousins (n=6623156)           |
|---------------|-------------------------------|-------------------------------|-------------------------------|-------------------------------|
| Proband score | Cases, No./person at risk No. |
| Score ≤1      | 2482/20490                    | 183908/1304200                | 152542/783624                 | 884780/5538768                |
| Score ≥2      | 1048/3530                     | 58000/241908                  | 48810/201352                  | 199608/1084388                |

<sup>£</sup>Based on double entry.

**Supplementary Table S22.** Number of observation and cases in Table 5, i.e. Cases, No./person at risk No in Table 5. <sup>£</sup>

|               |          | Twins (n=24020)               | Siblings (n=1546108)          | Half-siblings (n=984976)      | Cousins (n=6623156)           |
|---------------|----------|-------------------------------|-------------------------------|-------------------------------|-------------------------------|
| Proband score |          | Cases, No./person at risk No. |
| F1            | Score ≤1 | 157/23853                     | 16218/1528812                 | 13911/970521                  | 88399/6532075                 |
|               | Score ≥2 | 10/167                        | 1078/17296                    | 544/14455                     | 2682/91081                    |
| F2            | Score ≤1 | 792/23042                     | 59662/1478190                 | 65695/911433                  | 295130/6308020                |
|               | Score ≥2 | 186/978                       | 8256/67918                    | 7848/73543                    | 20006/315136                  |
| F3            | Score ≤1 | NA                            | 1587/1544505                  | 1275/983695                   | 7986/6615158                  |
|               | Score ≥2 | NA                            | 16/1603                       | 6/1281                        | 12/7998                       |
| F4            | Score ≤1 | 101/23915                     | 5301/1540743                  | 4171/980789                   | 24829/6598217                 |
|               | Score ≥2 | 4/105                         | 64/5365                       | 16/4187                       | 110/24939                     |
| F5            | Score ≤1 | 32/23986                      | 3178/1542882                  | 2358/982588                   | 15374/6607706                 |
|               | Score ≥2 | 2/34                          | 48/3226                       | 30/2388                       | 76/15450                      |
| F6            | Score ≤1 | 67/23947                      | 7516/1538328                  | 6285/978551                   | 39268/6583364                 |
|               | Score ≥2 | 6/73                          | 264/7780                      | 140/6425                      | 524/39792                     |
| F7            | Score ≤1 | NA                            | NA                            | NA                            | NA                            |
|               | Score ≥2 | NA                            | NA                            | NA                            | NA                            |
| F8            | Score ≤1 | 579/23259                     | 30275/1511947                 | 22215/961669                  | 122665/6496331                |
|               | Score ≥2 | 182/761                       | 3886/34161                    | 1092/23307                    | 4160/126825                   |
| F9            | Score ≤1 | NA                            | NA                            | NA                            | NA                            |
|               | Score ≥2 | NA                            | NA                            | NA                            | NA                            |

<sup>£</sup>Based on double entry.

**Supplement Figure S1.** Plot of Eigenvalues according to number of factors in principal component analysis (PCA). The curve is flattening after 9 factors.

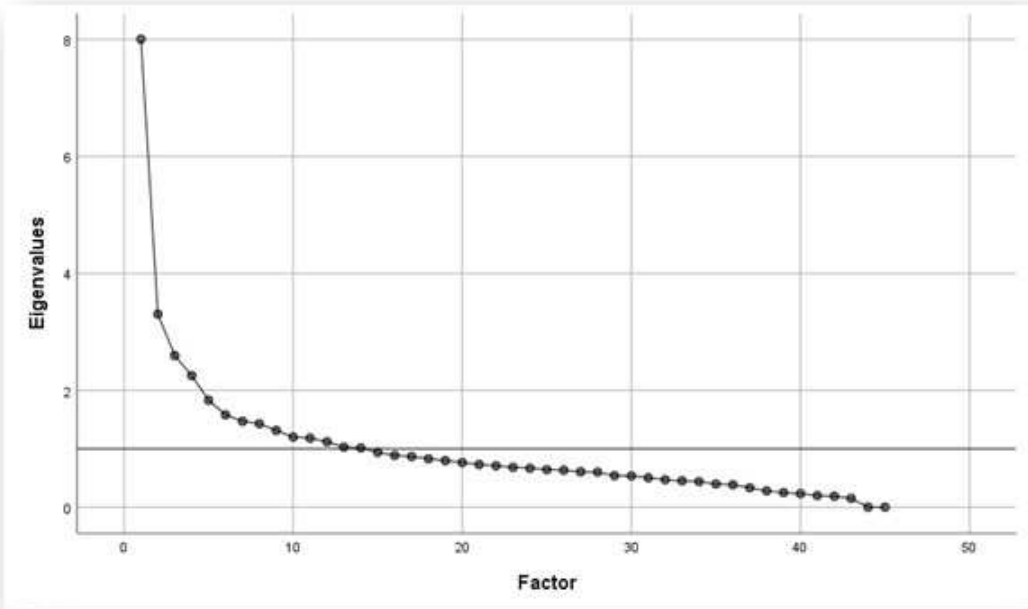

## Statistical section

Principal component analysis (PCA) is a technique to describe the directions, i.e. linear combinations of the variables (i.e. diagnoses), that contain the majority of the co-variation of the diagnoses as is described by a correlation matrix.<sup>28,29</sup> These directions (the so-called eigenvectors) together with the eigenvalues (describing the variances in those directions) can fully describe the correlation structure seen among the 45 included diagnoses. A reduced number of eigenvectors (with large corresponding eigenvalues) can to a large extent reproduce the pattern seen in the correlation matrix. A factor analysis model is an attempt to explain the pattern seen in the correlation matrix as some variations occurring in the diagnoses from some common factors (the communality) and some other variations (the specific variances) that are unique to each individual variable (diagnosis) and not shared with other diagnoses as opposed to the communality.

In estimating such a model description, one possibility is to start with the eigenvectors from a PCA decomposition and rotate these in an oblique manner (non-orthogonal rotation) in order to assign as much as possible of the correlation pattern into the communality part, describing the influence from several – possibly correlated – common factors. Hence an initial principal component decomposition followed by a factor analysis with the principal factor method and an oblique promax rotation was used on the correlation matrix of tetra-choric correlations between the 45 diagnoses in patients to identify disease clusters. The disease clusters obtained by the factor analysis at the individual level were used for determination of familial risks among those smaller disease clusters. Thus, using PCA and factor analysis, we aimed to determine if disease clustering in multimorbidity is disease-specific or not.
